# Supplementary material
Source: PubMed Central journal article supplement (PMC5852677)

|                                                 | <b>RCT 1</b> |           | <b>RCT 2</b> |           | <b>Additional</b> |           | <b>F</b>              | <b>p</b> |
|-------------------------------------------------|--------------|-----------|--------------|-----------|-------------------|-----------|-----------------------|----------|
|                                                 | <b>n=18</b>  |           | <b>n=15</b>  |           | <b>n=8</b>        |           |                       |          |
|                                                 | <b>Mean</b>  | <b>SD</b> | <b>Mean</b>  | <b>SD</b> | <b>Mean</b>       | <b>SD</b> |                       |          |
| <b>Age</b>                                      | 46.94        | 11.96     | 46.73        | 10.43     | 44.14             | 9.06      | 0.18                  | 0.84     |
| <b>Age of onset of first depressive episode</b> | 19.11        | 8.09      | 16.20        | 6.82      | 19.33             | 3.78      | 0.8                   | 0.46     |
| <b>Length of current episode (months)</b>       | 14.94        | 13.40     | 20.93        | 27.51     | 19.50             | 22.96     | 0.34                  | 0.71     |
| <b>BMI</b>                                      | 32.15        | 6.00      | 27.85        | 5.89      | 28.86             | 3.13      | 2.58                  | 0.09     |
| <b>Baseline BDI</b>                             | 30.00        | 8.17      | 29.73        | 6.43      | 27.00             | 9.04      | 0.45                  | 0.64     |
| <b>Baseline HAM-D</b>                           | 21.22        | 4.04      | 23.00        | 4.00      | 21.75             | 5.15      | 0.73                  | 0.48     |
| <b>Baseline MADRS</b>                           | 32.56        | 4.69      | 34.93        | 5.51      | 35.00             | 5.32      | 1.11                  | 0.34     |
| <b>Baseline SHAPS</b>                           | 35.89        | 7.36      | 37.87        | 7.52      | 37.38             | 9.68      | 0.27                  | 0.76     |
|                                                 |              |           |              |           |                   |           | <b>X2 or Fisher's</b> |          |
|                                                 | <b>n</b>     | <b>%</b>  | <b>n</b>     | <b>%</b>  | <b>n</b>          | <b>%</b>  | <b>exact</b>          | <b>p</b> |
| <b>Female</b>                                   | 12           | 67        | 8            | 53        | 3                 | 38        | 1.99                  | 0.37     |
| <b>Caucasian</b>                                | 15           | 83        | 14           | 93        | 5                 | 63        |                       | 0.36     |
| <b>Bipolar Depression</b>                       | 18           | 100       | 15           | 100       | 8                 | 100       |                       | n/a      |
| <b>History of suicide attempt</b>               | 9            | 50        | 7            | 47        | 2                 | 25        |                       | 0.08     |

RCT: Randomized controlled trial; BMI: body mass index; BDI: Beck Depression Inventory; HAM-D: Hamilton Depression

Rating Scale; MADRS: Montgomery-Asberg Depression Rating Scale; SHAPS: Snaith-Hamilton Pleasure Scale

Table 2b. Results of exploratory factor analysis (factor loadings and correlation matrix for 8-factor solution)

|          | 1 (Depressed Mood) | 2 (Tension) | 3 (Negative Cognition) | 4 (Suicidal Thoughts) | 5 (Impaired Sleep) | 6 (Reduced Appetite) | 7 (Anhedonia) | 8 (Amotivation) |
|----------|--------------------|-------------|------------------------|-----------------------|--------------------|----------------------|---------------|-----------------|
| CMARS_01 | 0.789*             | -0.041      | 0.24                   | 0.025                 | 0.088              | 0.049                | 0.059         | -0.047          |
| CMARS_02 | 0.844*             | -0.122      | 0.344*                 | -0.075                | -0.046             | 0.064                | -0.022        | 0.081           |
| CMARS_13 | 0.245*             | 0.111       | 0.389*                 | 0.371*                | -0.039             | -0.106               | 0.006         | 0.009           |
| CMARS_14 | 0.02               | 0.158       | 0.607*                 | 0.158                 | -0.106             | -0.319*              | -0.019        | -0.212          |
| CMARS_19 | 0.04               | 0.901*      | 0.074                  | -0.06                 | 0                  | 0.058                | -0.072        | 0.026           |
| CMARS_25 | -0.004             | 0.863*      | 0.057                  | -0.008                | -0.007             | 0.046                | 0.058         | 0.079           |
| CMARS_29 | 0.169              | 0.027       | 0.01                   | 0.700*                | 0.063              | 0.119                | 0.018         | -0.450*         |
| CMARS_32 | 0.051              | 0.002       | -0.042                 | 0.112                 | 0.716*             | -0.012               | -0.143        | -0.01           |
| CMARS_35 | 0.016              | 0.126       | -0.184                 | -0.001                | 0.695*             | -0.18                | 0.126         | -0.141          |
| CMARS_37 | 0.047              | -0.356*     | 0.188                  | 0.003                 | 0.619*             | 0.056                | -0.213        | -0.014          |
| CMARS_39 | -0.056             | -0.188      | -0.025                 | 0.312*                | 0.578*             | 0.152                | -0.326*       | 0.057           |
| CMARS_43 | 0.061              | 0.028       | 0.058                  | -0.094                | -0.024             | 0.917*               | 0.158         | -0.227          |
| CMARS_45 | 0.12               | -0.022      | 0.238                  | 0.04                  | -0.028             | 0.485*               | -0.093        | -0.04           |
| CMARS_54 | 0.373*             | 0.075       | 0.061                  | -0.091                | 0.086              | 0.215                | 0.177         | 0.112           |
| CMARS_60 | 0.285*             | 0.083       | 0.121                  | -0.02                 | 0.128              | 0.201                | 0.082         | 0.226           |
| CMARS_65 | 0.612*             | 0.072       | -0.177                 | 0.087                 | -0.035             | 0.087                | 0.171         | 0.159           |
| CMARS_66 | 0.535*             | 0.254       | -0.271                 | 0.05                  | -0.006             | 0.251                | -0.201        | 0.255           |
| CMARS_77 | 0.086              | 0.234*      | 0.037                  | -0.043                | 0.247*             | -0.021               | -0.048        | 0.226           |
| CMARS_85 | -0.176             | 0.320*      | 0.007                  | 0.191                 | 0.321*             | -0.066               | -0.009        | -0.036          |
| CMARS_93 | 0.768*             | 0.244*      | 0.008                  | 0.081                 | 0.018              | -0.032               | -0.138        | -0.214          |
| CMARS_94 | 0.545*             | -0.02       | 0.03                   | -0.028                | 0.03               | -0.047               | 0.054         | -0.168          |
| CMARS_95 | -0.131             | 0.283*      | 0.062                  | 0.043                 | 0.19               | -0.213               | 0.233         | -0.006          |
| BDI_01   | 0.507*             | 0.017       | 0.244*                 | 0.346*                | 0.026              | -0.088               | 0.025         | -0.033          |
| BDI_02   | 0.157              | -0.019      | 0.121                  | 0.667*                | 0.148              | -0.045               | 0.024         | 0.048           |
| BDI_03   | -0.049             | 0.003       | 0.489*                 | 0.563*                | 0.022              | 0.042                | -0.064        | 0.055           |
| BDI_04   | 0.124              | 0.017       | -0.098                 | 0.372*                | -0.058             | -0.133               | 0.238         | 0.567*          |
| BDI_05   | 0.04               | 0.004       | 0.713*                 | 0.031                 | 0.045              | -0.308*              | 0.19          | 0.003           |
| BDI_06   | -0.201             | 0.129       | 0.482*                 | 0.091                 | -0.127             | 0.154                | -0.059        | -0.059          |
| BDI_07   | 0.03               | 0.076       | 0.533*                 | 0.576*                | -0.062             | 0.031                | 0.093         | -0.007          |
| BDI_08   | 0.04               | 0.003       | 0.736*                 | 0.095                 | 0.082              | -0.208               | 0.019         | -0.054          |

Table 2b. Results of exploratory factor analysis (factor loadings and correlation matrix for 8-factor solution)

|        | 1 (Depressed Mood) | 2 (Tension) | 3 (Negative Cognition) | 4 (Suicidal Thoughts) | 5 (Impaired Sleep) | 6 (Reduced Appetite) | 7 (Anhedonia) | 8 (Amotivation) |
|--------|--------------------|-------------|------------------------|-----------------------|--------------------|----------------------|---------------|-----------------|
| BDI_09 | -0.048             | 0.005       | 0.186                  | 0.780*                | -0.021             | 0.029                | -0.016        | -0.400*         |
| BDI_10 | 0.003              | -0.029      | 0.588*                 | -0.089                | -0.01              | 0.026                | 0.098         | 0.027           |
| BDI_11 | 0.087              | 0.285*      | 0.268                  | -0.048                | 0.049              | -0.14                | 0.224         | 0.222           |
| BDI_12 | 0.115              | 0.013       | 0.095                  | 0.274                 | -0.027             | -0.11                | 0.268         | 0.328*          |
| BDI_13 | 0.015              | 0.098       | 0.288                  | 0.295*                | 0.087              | -0.054               | 0.184         | 0.337*          |
| BDI_14 | -0.316*            | 0.019       | 0.700*                 | -0.015                | 0.045              | -0.008               | -0.02         | 0.129           |
| BDI_15 | -0.029             | 0.028       | 0.392*                 | 0.022                 | -0.131             | 0.04                 | -0.045        | 0.718*          |
| BDI_16 | -0.052             | 0.039       | 0.075                  | -0.146                | 0.654*             | 0.174                | 0.018         | 0.019           |
| BDI_17 | -0.08              | 0.127       | 0.133                  | 0.196                 | 0.089              | 0.093                | 0.035         | 0.621*          |
| BDI_18 | 0.158              | 0.015       | -0.049                 | 0.046                 | 0.175*             | 0.759*               | 0.096         | -0.052          |
| BDI_19 | -0.132             | 0.019       | 0.171                  | 0.233                 | -0.003             | 0.057                | -0.088        | -0.169          |
| BDI_20 | -0.384*            | 0.300*      | 0.324*                 | 0.079                 | 0.076              | 0.017                | -0.024        | 0.02            |
| BDI_21 | 0.052              | -0.048      | 0.342*                 | -0.043                | 0.068              | 0.046                | 0.300*        | 0.105           |
| SH_01  | 0.001              | 0.004       | -0.152                 | 0.053                 | -0.121             | 0.330*               | 0.604*        | 0.141           |
| SH_02  | 0.066              | 0.007       | -0.109                 | 0.363*                | 0.159              | -0.026               | 0.425*        | 0.088           |
| SH_03  | 0.147              | -0.06       | -0.06                  | 0.213                 | -0.198*            | 0.048                | 0.411*        | 0.336*          |
| SH_04  | 0.155              | -0.035      | -0.012                 | 0.07                  | 0.018              | 0.529*               | 0.386*        | -0.002          |
| SH_05  | 0.202              | -0.119      | 0.055                  | 0.386*                | -0.045             | 0.136                | 0.259*        | 0.094           |
| SH_06  | -0.052             | -0.068      | -0.015                 | 0.294*                | 0.063              | 0.276*               | 0.599*        | -0.011          |
| SH_07  | -0.037             | 0.059       | -0.013                 | 0.195                 | -0.048             | -0.013               | 0.718*        | -0.285*         |
| SH_08  | -0.04              | 0.026       | 0.245*                 | -0.009                | -0.061             | 0.107                | 0.798*        | 0.004           |
| SH_09  | -0.009             | -0.244*     | 0.133                  | -0.088                | 0.182              | -0.013               | 0.582*        | 0.255*          |
| SH_10  | -0.182             | -0.003      | 0.002                  | 0.003                 | 0.143              | 0.215                | 0.657*        | 0.006           |
| SH_11  | -0.022             | -0.125      | -0.012                 | 0.354*                | 0.009              | -0.016               | 0.750*        | 0.026           |
| SH_12  | 0.014              | -0.019      | -0.003                 | 0.124                 | 0.003              | 0.349*               | 0.624*        | 0.225*          |
| SH_13  | 0.164              | -0.006      | -0.107                 | 0.043                 | 0.143              | -0.039               | 0.571*        | -0.057          |
| SH_14  | 0.073              | 0.071       | 0.097                  | -0.133                | -0.054             | 0.076                | 0.860*        | -0.118          |

Table 2b. Results of exploratory factor analysis (factor loadings and correlation matrix for 8-factor solution)

|                     | <b>1 (Depressed Mood)</b> | <b>2 (Tension)</b> | <b>3 (Negative Cognition)</b> | <b>4 (Suicidal Thoughts)</b> | <b>5 (Impaired Sleep)</b> | <b>6 (Reduced Appetite)</b> | <b>7 (Anhedonia)</b> | <b>8 (Amotivation)</b> |
|---------------------|---------------------------|--------------------|-------------------------------|------------------------------|---------------------------|-----------------------------|----------------------|------------------------|
| <b>Correlations</b> |                           |                    |                               |                              |                           |                             |                      |                        |
| Factor 2            | 0.1                       | 1                  |                               |                              |                           |                             |                      |                        |
| Factor 3            | 0.116                     | 0.357*             | 1                             |                              |                           |                             |                      |                        |
| Factor 4            | 0.230*                    | 0.200*             | 0.197*                        | 1                            |                           |                             |                      |                        |
| Factor 5            | 0.012                     | 0.099              | 0.132                         | 0.09                         | 1                         |                             |                      |                        |
| Factor 6            | 0.231*                    | -0.089             | 0.047                         | 0.081                        | 0.013                     | 1                           |                      |                        |
| Factor 7            | 0.320*                    | 0.015              | 0.089                         | 0.248*                       | 0.056                     | 0.163                       | 1                    |                        |
| Factor 8            | 0.192                     | 0.085              | 0.009                         | 0.195                        | 0.017                     | 0.099                       | 0.262*               | 1                      |

Note: Statistically significant (uncorrected p-value <.05) loadings and correlations are marked with an asterisk.

Table S3. Pearson correlations between subscale scores (rows) and factor scores (columns), N=119

|                               |          | <b>Depressed<br/>Mood</b> | <b>Tension</b> | <b>Negative<br/>Cognition</b> | <b>Suicidal<br/>Thoughts</b> | <b>Impaired<br/>Sleep</b> | <b>Reduced<br/>Appetite</b> | <b>Anhedonia</b> | <b>Amotivation</b> |
|-------------------------------|----------|---------------------------|----------------|-------------------------------|------------------------------|---------------------------|-----------------------------|------------------|--------------------|
| <b>Depressed<br/>Mood</b>     | <i>r</i> | 0.94966                   | 0.28899        | 0.43016                       | 0.49591                      | 0.03911                   | 0.49476                     | 0.45242          | 0.4758             |
|                               | <i>p</i> | <.0001                    | 0.0014         | <.0001                        | <.0001                       | 0.6728                    | <.0001                      | <.0001           | <.0001             |
| <b>Tension</b>                | <i>r</i> | 0.12139                   | 0.84071        | 0.44954                       | 0.22831                      | 0.08897                   | -0.0886                     | 0.01412          | 0.28033            |
|                               | <i>p</i> | 0.1885                    | <.0001         | <.0001                        | 0.0125                       | 0.336                     | 0.3379                      | 0.8789           | 0.002              |
| <b>Negative<br/>Cognition</b> | <i>r</i> | 0.32325                   | 0.53895        | 0.88566                       | 0.55838                      | 0.14113                   | 0.07371                     | 0.24884          | 0.4549             |
|                               | <i>p</i> | 0.0003                    | <.0001         | <.0001                        | <.0001                       | 0.1258                    | 0.4256                      | 0.0064           | <.0001             |
| <b>Suicidal<br/>Thoughts</b>  | <i>r</i> | 0.42082                   | 0.30949        | 0.64313                       | 0.94542                      | 0.32965                   | 0.23579                     | 0.34143          | 0.41349            |
|                               | <i>p</i> | <.0001                    | 0.0006         | <.0001                        | <.0001                       | 0.0003                    | 0.0098                      | 0.0001           | <.0001             |
| <b>Impaired Sleep</b>         | <i>r</i> | 0.02953                   | 0.0882         | 0.09676                       | 0.26989                      | 0.96183                   | 0.05698                     | -0.03816         | -0.01421           |
|                               | <i>p</i> | 0.7498                    | 0.3402         | 0.2952                        | 0.003                        | <.0001                    | 0.5382                      | 0.6803           | 0.8781             |
| <b>Reduced<br/>Appetite</b>   | <i>r</i> | 0.43787                   | 0.01543        | 0.1027                        | 0.20921                      | 0.04527                   | 0.85648                     | 0.46797          | 0.16107            |
|                               | <i>p</i> | <.0001                    | 0.8677         | 0.2664                        | 0.0224                       | 0.625                     | <.0001                      | <.0001           | 0.0801             |
| <b>Anhedonia</b>              | <i>r</i> | 0.49916                   | 0.08581        | 0.3335                        | 0.41484                      | -0.00927                  | 0.64593                     | 0.97988          | 0.68179            |
|                               | <i>p</i> | <.0001                    | 0.3535         | 0.0002                        | <.0001                       | 0.9203                    | <.0001                      | <.0001           | <.0001             |
| <b>Amotivation</b>            | <i>r</i> | 0.47668                   | 0.37387        | 0.49547                       | 0.42652                      | 0.00854                   | 0.25415                     | 0.58481          | 0.94538            |
|                               | <i>p</i> | <.0001                    | <.0001         | <.0001                        | <.0001                       | 0.9266                    | 0.0053                      | <.0001           | <.0001             |

**Figure S1. Scatter plot of summed scores (vertical axis) versus factor scores (horizontal axis)**

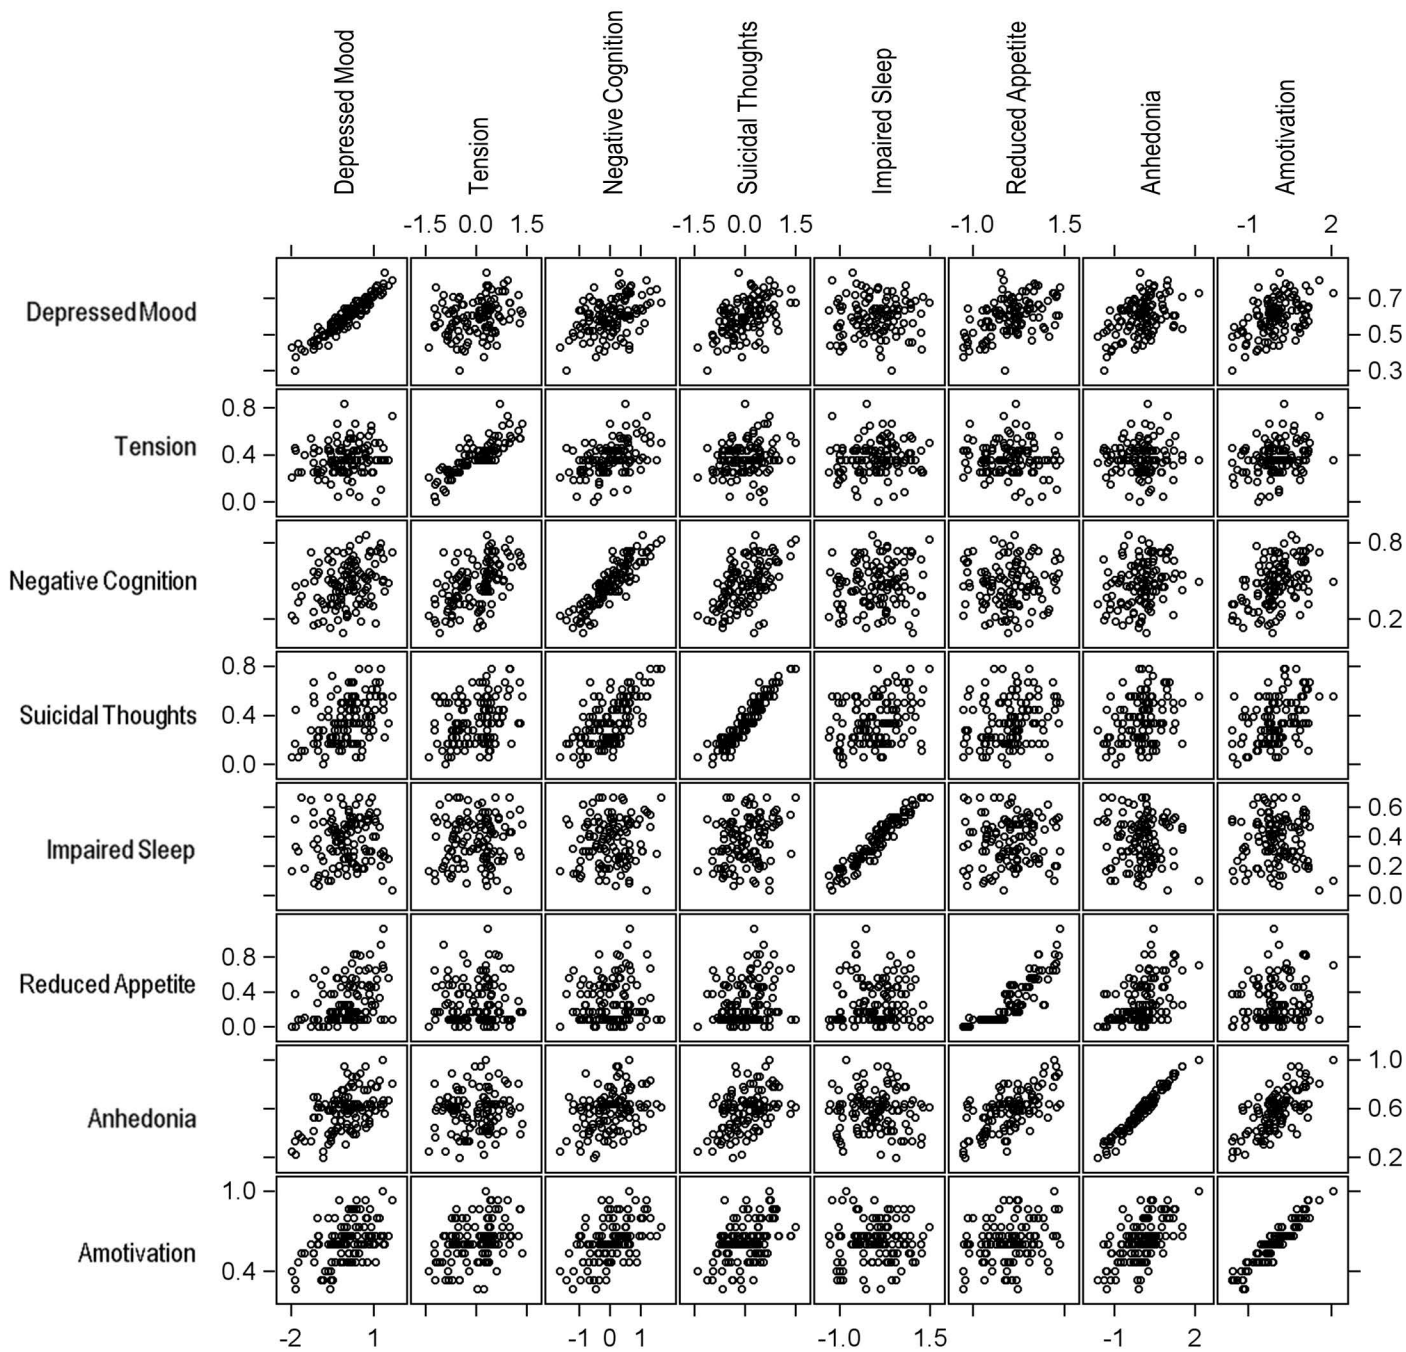

Supplement: NIHMS942492-supplement-1.pdf [file NIHMS942492-supplement-1.pdf]
